# Supplementary material
Source: MDPI journal article supplement (https://www.mdpi.com/2227-9717/10/9/1771)
Supplement: s1 [file s1]

Supplemental Files

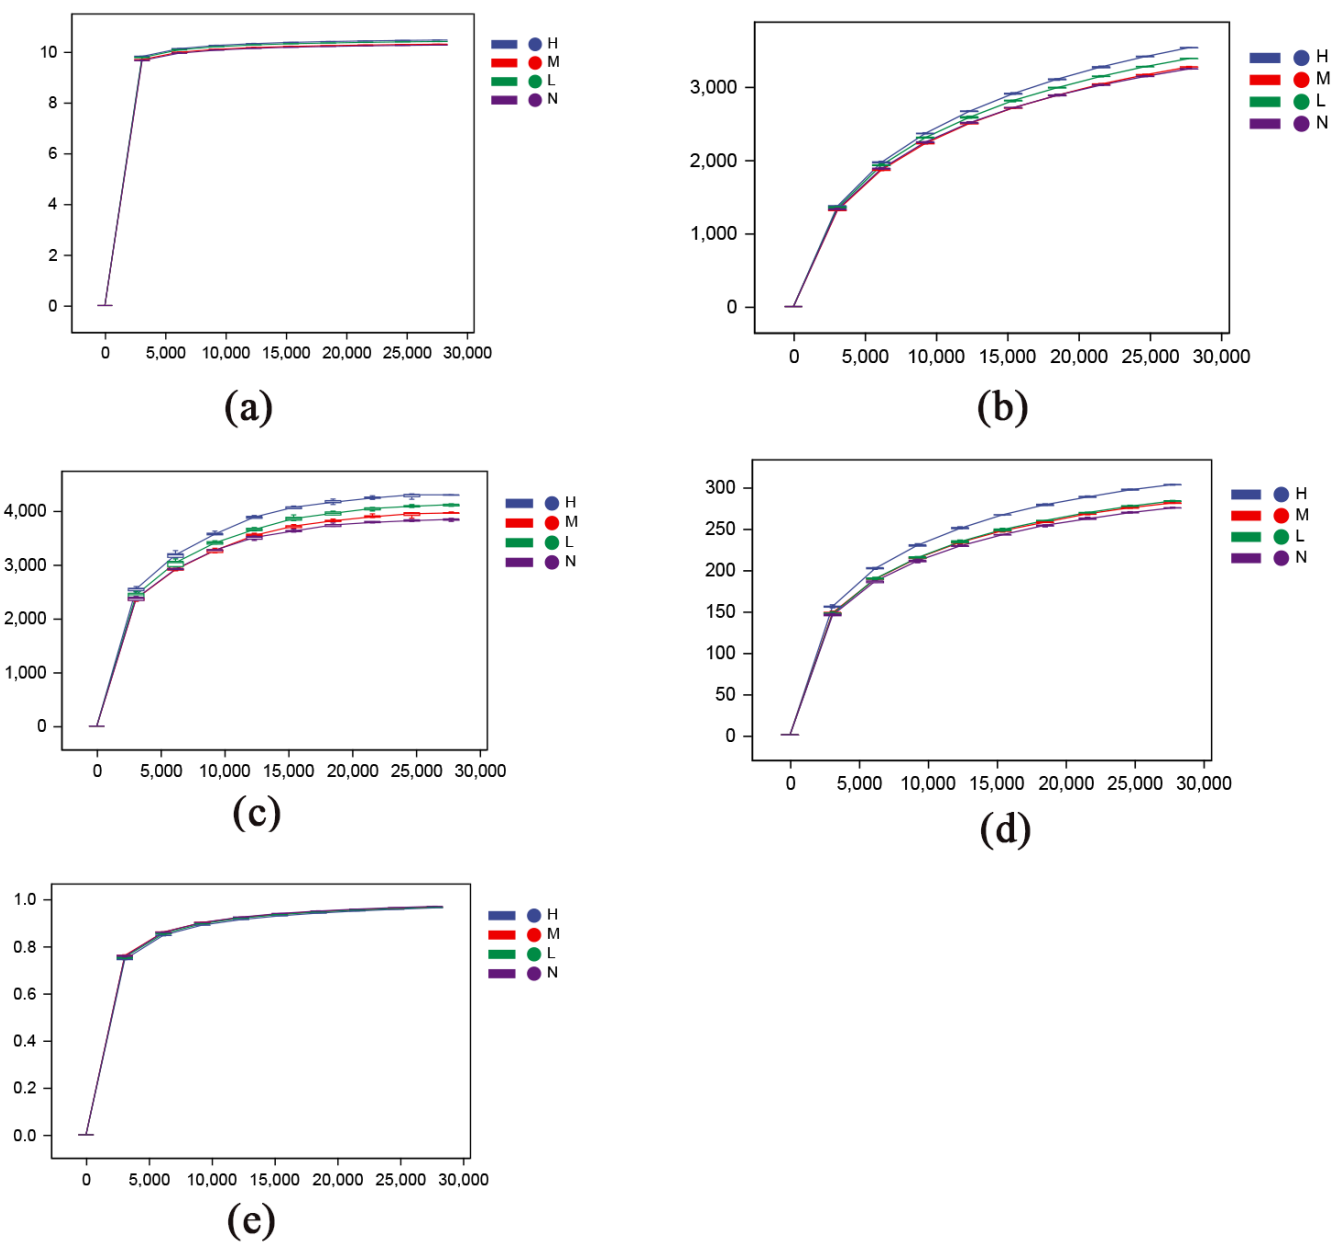

Figure S1. (a-e) Rarefaction curves at Shannon index, observed species, Chao1 index, Good's coverage, and Faith pd values level with different degrees of regeneration, respectively.

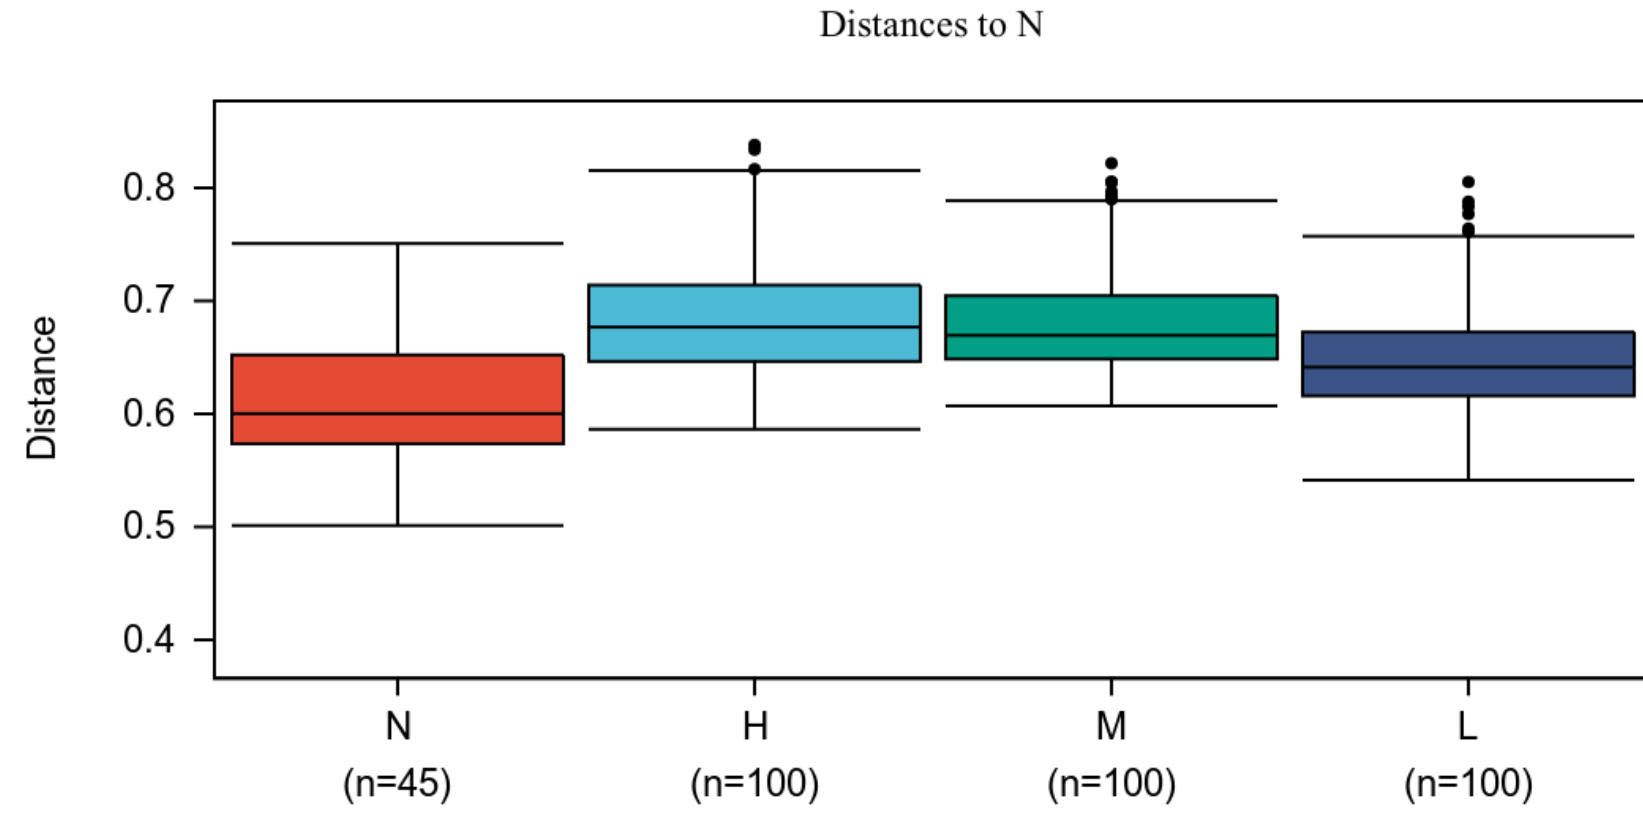

Figure S2. Dissimilarity distance showing the differences in bacterial structure between Inter-group with different degrees of regeneration.

**Table S1.** Analysis of similarities (ANOSIM) and permutational multivariate analysis of variance (PERMANOVA) based on Bray Curtis distance with different regeneration degree

| Group1 | Group2 | F        | P     | R <sup>2</sup> |
|--------|--------|----------|-------|----------------|
| all    | -      | 2.487012 | 0.001 | 0.404          |
| H      | M      | 1.474092 | 0.002 | 0.158          |
| H      | L      | 1.652074 | 0.004 | 0.211          |
| H      | N      | 3.325409 | 0.001 | 0.606          |
| M      | L      | 1.496214 | 0.003 | 0.172          |
| M      | N      | 4.218141 | 0.001 | 0.749          |
| L      | N      | 2.659608 | 0.001 | 0.521          |

**Table S2.** Soil bacterial community co-occurrence network characteristics with different regeneration degree

| Group | Number<br>of nodes | Number<br>of edges | Positive edges | Negative edges | avg K  | Den.  | ACC   | AWD    | Modularity | GD    | N/P cohesion | No. of<br>modules |
|-------|--------------------|--------------------|----------------|----------------|--------|-------|-------|--------|------------|-------|--------------|-------------------|
| N     | 99                 | 664                | 586(88.25%)    | 78(11.75%)     | 13.414 | 0.137 | 0.605 | 10.469 | 0.562      | 2.911 | 13.31%       | 5                 |
| L     | 100                | 579                | 506(87.39%)    | 73(12.61%)     | 11.58  | 0.117 | 0.588 | 8.988  | 0.575      | 2.962 | 14.43%       | 7                 |
| M     | 99                 | 530                | 478(90.19%)    | 52(9.18%)      | 10.707 | 0.109 | 0.585 | 8.238  | 0.629      | 2.969 | 10.88%       | 7                 |
| H     | 100                | 502                | 484(96.41%)    | 18(3.59%)      | 10.04  | 0.101 | 0.624 | 8.156  | 0.681      | 3.567 | 3.70%        | 8                 |

Note: avg K, average degree; Den., density; ACC, average clustering coefficient; AWD, average weighted degree; GD, average path distance; N/P cohesion, proportion of negatively correlated connections

**Table S3.** Topological properties of potential functional co-occurrence networks of soil bacterial communities with different regeneration degree

| Group | Number of nodes | Number of edges | avg. degree | den.  | avg.CC | Avg. weighted degree | Mod. degree | Avg. path distance |
|-------|-----------------|-----------------|-------------|-------|--------|----------------------|-------------|--------------------|
| N     | 99              | 2415            | 48.788      | 0.498 | 0.843  | 41.148               | 0.258       | 1.632              |
| L     | 99              | 4129            | 83.414      | 0.851 | 0.982  | 75.968               | 0.015       | 1.058              |
| M     | 100             | 3344            | 66.88       | 0.676 | 0.85   | 55.49                | 0.129       | 1.369              |
| H     | 99              | 3372            | 68.121      | 0.695 | 0.864  | 57.623               | 0.093       | 1.431              |

Note: avg. degree, average degree; den., density; avg.CC, average clustering coefficient; Avg. weighted degree, average weighted degree; Mod. Degree, modularity; Avg. path distance, average path distance

**Table S4.** Percent variance explained of the degree of regeneration by each environmental factor.

| Name       | Explains % | Contribution % | pseudo-F | P     |
|------------|------------|----------------|----------|-------|
| Metabolism | 47.2       | 48.5           | 34       | 0.002 |
| avg K      | 22.1       | 22.7           | 26.7     | 0.002 |
| H. Pielou  | 8.9        | 9.1            | 14.7     | 0.002 |
| ST         | 4          | 4.1            | 7.9      | 0.006 |
| INV        | 1          | 1.1            | 5.4      | 0.022 |
| LAI        | 1.6        | 1.7            | 5        | 0.036 |
| Density    | 1.6        | 1.6            | 4.3      | 0.042 |
| Tit Max.   | 1.1        | 1.2            | 3.8      | 0.05  |
| RLI        | 0.5        | 0.5            | 3.3      | 0.054 |
| H. Simpson | 1.4        | 1.4            | 3.1      | 0.06  |
| H. Shannon | 1.2        | 1.3            | 2.7      | 0.098 |
| AK         | 1.2        | 1.2            | 2.5      | 0.11  |
| Altitude   | 1          | 1              | 2.3      | 0.13  |
| PHO        | 0.4        | 0.4            | 2.3      | 0.13  |
| URE        | 0.4        | 0.4            | 2.2      | 0.136 |
| SW         | 0.8        | 0.8            | 2        | 0.166 |
| AN         | 0.2        | 0.2            | 1.2      | 0.318 |
| Tit T      | 0.2        | 0.2            | 1        | 0.32  |
| H          | 0.1        | 0.1            | 0.7      | 0.434 |
| AP         | <0.1       | <0.1           | 0.5      | 0.536 |
| Chao1      | <0.1       | <0.1           | 0.4      | 0.55  |
| Slope      | <0.1       | <0.1           | 0.4      | 0.596 |
| CO         | <0.1       | <0.1           | 0.2      | 0.73  |
| Shannon    | <0.1       | <0.1           | 0.1      | 0.772 |

**Table S5.** Correlation analysis of several environmental factors with regeneration.

|            |         |         |          |        |         |        |         |         |         | Tit    |         |        |        |         |        |         |         |        |        |         | H.     |         | H,      | H.     |         | avg     |            |            |
|------------|---------|---------|----------|--------|---------|--------|---------|---------|---------|--------|---------|--------|--------|---------|--------|---------|---------|--------|--------|---------|--------|---------|---------|--------|---------|---------|------------|------------|
|            | Number  | ATH     | Altitude | Slope  | Density | H      | CO      | RLI     | LAI     | Tit T  | Max.    | SW     | ST     | AN      | AP     | AK      | PHO     | INV    | URE    | Shannon | Pielou | Simpson | Shannon | Chao1  | N/P     | K       | Modularity | Metabolism |
| Number     | 1       |         |          |        |         |        |         |         |         |        |         |        |        |         |        |         |         |        |        |         |        |         |         |        |         |         |            |            |
| ATH        | 0.057   | 1       |          |        |         |        |         |         |         |        |         |        |        |         |        |         |         |        |        |         |        |         |         |        |         |         |            |            |
| Altitude   | 0.094   | -0.302  | 1        |        |         |        |         |         |         |        |         |        |        |         |        |         |         |        |        |         |        |         |         |        |         |         |            |            |
| Slope      | -0.246  | -.472** | 0.298    | 1      |         |        |         |         |         |        |         |        |        |         |        |         |         |        |        |         |        |         |         |        |         |         |            |            |
| Density    | 0.065   | 0.099   | 0.201    | -0.131 | 1       |        |         |         |         |        |         |        |        |         |        |         |         |        |        |         |        |         |         |        |         |         |            |            |
| H          | 0.030   | 0.089   | -0.019   | 0.306  | 0.009   | 1      |         |         |         |        |         |        |        |         |        |         |         |        |        |         |        |         |         |        |         |         |            |            |
| CO         | 0.023   | -0.077  | -0.215   | -0.172 | -.614** | -0.096 | 1       |         |         |        |         |        |        |         |        |         |         |        |        |         |        |         |         |        |         |         |            |            |
| RLI        | -0.124  | -0.044  | -0.183   | -0.044 | -.657** | -0.031 | .949**  | 1       |         |        |         |        |        |         |        |         |         |        |        |         |        |         |         |        |         |         |            |            |
| LAI        | 0.069   | 0.050   | 0.153    | 0.090  | .629**  | 0.034  | -.958** | -.958** | 1       |        |         |        |        |         |        |         |         |        |        |         |        |         |         |        |         |         |            |            |
| Tit T      | -0.122  | -0.221  | .336*    | -0.001 | .469**  | -0.101 | -0.068  | -0.080  | -0.024  | 1      |         |        |        |         |        |         |         |        |        |         |        |         |         |        |         |         |            |            |
| Tit Max.   | -0.040  | -0.250  | 0.248    | 0.052  | .406**  | -0.229 | -0.090  | -0.145  | 0.041   | .752** | 1       |        |        |         |        |         |         |        |        |         |        |         |         |        |         |         |            |            |
| SW         | -0.188  | -0.138  | .352*    | 0.271  | -.365*  | 0.166  | 0.138   | 0.259   | -0.199  | -0.135 | -.411** | 1      |        |         |        |         |         |        |        |         |        |         |         |        |         |         |            |            |
| ST         | 0.136   | -.465** | 0.013    | 0.126  | -0.140  | -0.069 | .509**  | .438**  | -.505** | -0.017 | 0.014   | 0.167  | 1      |         |        |         |         |        |        |         |        |         |         |        |         |         |            |            |
| AN         | -.406** | -0.293  | .366*    | .408** | -0.228  | 0.033  | -0.071  | 0.006   | 0.003   | 0.023  | -0.036  | .473** | -0.051 | 1       |        |         |         |        |        |         |        |         |         |        |         |         |            |            |
| AP         | -0.142  | 0.044   | -0.228   | 0.124  | 0.061   | 0.158  | 0.024   | 0.044   | 0.007   | 0.177  | 0.085   | -0.182 | -0.137 | -0.076  | 1      |         |         |        |        |         |        |         |         |        |         |         |            |            |
| AK         | -0.178  | 0.036   | 0.080    | 0.140  | 0.030   | 0.104  | -0.068  | -0.059  | -0.001  | -0.005 | -0.194  | 0.145  | -0.047 | .351*   | -0.171 | 1       |         |        |        |         |        |         |         |        |         |         |            |            |
| PHO        | -.327*  | -0.104  | -0.005   | 0.000  | 0.099   | -0.041 | -0.079  | -0.061  | 0.109   | -0.032 | -0.125  | -0.042 | -0.053 | 0.237   | 0.264  | 0.269   | 1       |        |        |         |        |         |         |        |         |         |            |            |
| INV        | -0.067  | 0.047   | -.371*   | -0.120 | -0.220  | 0.106  | -0.064  | -0.080  | 0.099   | -.322* | -0.290  | -0.026 | 0.038  | -0.183  | 0.250  | -0.099  | 0.125   | 1      |        |         |        |         |         |        |         |         |            |            |
| URE        | -0.112  | -0.014  | -0.070   | -0.110 | 0.119   | -.357* | -0.234  | -0.239  | 0.211   | 0.282  | 0.106   | -0.153 | -.391* | -0.011  | 0.096  | 0.269   | 0.258   | -0.007 | 1      |         |        |         |         |        |         |         |            |            |
| H. Shannon | -0.129  | 0.174   | .356*    | -0.042 | 0.247   | -0.109 | 0.086   | 0.112   | -0.087  | 0.084  | -0.046  | 0.202  | 0.177  | 0.040   | -0.086 | 0.016   | 0.071   | -0.312 | -0.308 | 1       |        |         |         |        |         |         |            |            |
| H. Pielou  | -.350*  | .421**  | 0.140    | 0.028  | 0.033   | 0.212  | 0.004   | 0.119   | -0.126  | 0.134  | 0.007   | 0.201  | -0.163 | 0.195   | 0.126  | 0.120   | 0.110   | -0.308 | -0.238 | .510**  | 1      |         |         |        |         |         |            |            |
| H. Simpson | -0.044  | -0.005  | .387*    | 0.044  | 0.219   | -0.154 | 0.064   | 0.132   | -0.048  | 0.160  | -0.019  | 0.227  | 0.185  | 0.033   | 0.085  | -0.159  | 0.101   | -0.258 | -0.285 | .886**  | .389*  | 1       |         |        |         |         |            |            |
| Shannon    | 0.191   | -0.067  | 0.084    | -0.115 | -0.024  | -0.029 | 0.139   | 0.133   | -0.057  | -0.056 | -0.072  | 0.129  | 0.166  | -0.177  | 0.104  | -.583** | -0.115  | -0.139 | -0.216 | 0.221   | 0.036  | .380*   | 1       |        |         |         |            |            |
| Chao1      | 0.280   | 0.122   | 0.168    | -0.301 | 0.038   | 0.082  | 0.158   | 0.136   | -0.110  | 0.027  | -0.034  | 0.084  | 0.065  | -0.220  | 0.101  | -.368*  | -0.196  | -0.193 | -.364* | .390*   | 0.230  | .460**  | .772**  | 1      |         |         |            |            |
| N/P        | -.947** | -0.142  | -0.181   | 0.202  | -0.117  | 0.060  | 0.059   | 0.191   | -0.138  | 0.116  | -0.013  | 0.147  | -0.057 | .381*   | 0.274  | 0.139   | .433**  | 0.129  | 0.057  | 0.086   | .385*  | 0.060   | -0.148  | -0.227 | 1       |         |            |            |
| avg K      | -.715** | -.551** | 0.284    | .569** | 0.018   | 0.155  | -0.029  | 0.077   | -0.068  | .345*  | 0.154   | .371*  | 0.136  | .568**  | 0.125  | 0.257   | 0.210   | -0.168 | 0.016  | 0.063   | 0.188  | 0.087   | -0.170  | -0.250 | .726**  | 1       |            |            |
| Modularity | .891**  | .339*   | -0.010   | -.349* | 0.034   | -0.114 | -0.008  | -0.131  | 0.089   | -0.229 | -0.024  | -0.257 | -0.018 | -.477** | -0.262 | -0.207  | -.428** | -0.023 | -0.069 | -0.109  | -.326* | -0.118  | 0.148   | 0.231  | -.949** | -.890** | 1          |            |
| Metabolism | .964**  | 0.127   | 0.181    | -0.238 | 0.161   | -0.047 | -0.082  | -0.221  | 0.176   | -0.107 | -0.036  | -0.143 | 0.050  | -.391*  | -0.223 | -0.126  | -.340*  | -0.108 | -0.021 | -0.047  | -.380* | 0.000   | 0.175   | 0.255  | -.987** | -.723** | .922**     | 1          |

The main variables measured in each sample plot were as follows: (1) topographic factors (altitude, slope); (2) stand structure factors (Density, diameter at breast height, height(H)); (3) light factors (canopy opening (CO), relative light intensity (RLI), and leaf area index (LAI) in the sample plot); (4) soil characteristics: soil moisture (SW), soil temperature (ST), available nitrogen (AN), available phosphorus (AP), available potassium (AK), phosphatase (PHO), invertase (INV), urease (URE); (5) litter characteristics: litter thickness (Tit T), and their maximum water holding capacity (Tit Max.); (6) herbaceous diversity: Shannon index (H. Shannon), Simpson index (H. Simpson), evenness index (H. Pielou); (7) Soil bacteria composition and network structure: Shannon index(Shannon), Chao1, N/P cohesion(N/P), average degree(avg K), Modularity, metabolic functions(Metabolism)

**Table S6.** Percent variance explained of the extent of regeneration by each soil bacterial community.

| Phylum            | Explains<br>% | Contribution<br>% | pseudo-<br>F | P     |
|-------------------|---------------|-------------------|--------------|-------|
| Nitrospirae       | 9.2           | 16.4              | 3.8          | 0.022 |
| Latescibacteria   | 8.4           | 15.1              | 4            | 0.014 |
| Acidobacteria     | 6             | 10.8              | 2.6          | 0.098 |
| Actinobacteria    | 4.9           | 8.8               | 2.4          | 0.078 |
| Patescibacteria   | 4.6           | 8.2               | 2.4          | 0.09  |
| Entotheonellaeota | 4.2           | 7.4               | 2.1          | 0.122 |
| Dependentiae      | 3.9           | 7                 | 2.1          | 0.116 |
| Firmicutes        | 3.7           | 6.7               | 2            | 0.134 |
| Gemmatimonadetes  | 2.3           | 4.1               | 1.3          | 0.332 |
| Rokubacteria      | 2             | 3.7               | 1.1          | 0.332 |
| Bacteroidetes     | 1.8           | 3.3               | 1            | 0.372 |
| Planctomycetes    | 1.7           | 3.1               | 0.9          | 0.38  |
| Verrucomicrobia   | 1.6           | 2.9               | 0.9          | 0.46  |
| Chloroflexi       | 0.9           | 1.6               | 0.5          | 0.572 |
| Proteobacteria    | 0.5           | 0.8               | 0.2          | 0.778 |

**Table S7.** Correlation analysis of soil bacterial communities at phyla levels with regeneration

|         | Number  | ATH    | Proteo. | Actino. | Acido.  | Chlo.  | Rok.   | Gem.   | Verru. | Bac.   | Firm.   | Nitro.  | Pates. | Lates. | Planct. | Dep.  | Ento. |
|---------|---------|--------|---------|---------|---------|--------|--------|--------|--------|--------|---------|---------|--------|--------|---------|-------|-------|
| Number  | 1       |        |         |         |         |        |        |        |        |        |         |         |        |        |         |       |       |
| ATH     | 0.057   | 1      |         |         |         |        |        |        |        |        |         |         |        |        |         |       |       |
| Proteo. | 0.077   | 0.119  | 1       |         |         |        |        |        |        |        |         |         |        |        |         |       |       |
| Actino. | 0.030   | -0.068 | -0.136  | 1       |         |        |        |        |        |        |         |         |        |        |         |       |       |
| Actino. | 0.045   | -0.254 | -0.286  | -.756** | 1       |        |        |        |        |        |         |         |        |        |         |       |       |
| Chlo.   | -0.119  | 0.198  | -.675** | -.328*  | .332*   | 1      |        |        |        |        |         |         |        |        |         |       |       |
| Rok.    | -.313*  | -0.079 | -.323*  | -.657** | .653**  | .471** | 1      |        |        |        |         |         |        |        |         |       |       |
| Gem.    | -0.109  | 0.238  | -.570** | -.359*  | .334*   | .737** | .395*  | 1      |        |        |         |         |        |        |         |       |       |
| Verru.  | 0.165   | -0.029 | -0.156  | -0.172  | 0.249   | -0.116 | 0.089  | 0.121  | 1      |        |         |         |        |        |         |       |       |
| Bac.    | 0.230   | 0.012  | 0.066   | 0.049   | 0.100   | -0.243 | -0.189 | -0.167 | -0.086 | 1      |         |         |        |        |         |       |       |
| Firm.   | -0.157  | 0.014  | 0.021   | .518**  | -.674** | -0.218 | -.379* | -0.287 | -0.164 | -0.211 | 1       |         |        |        |         |       |       |
| Nitro.  | -.423** | -0.068 | -0.129  | -.458** | .416**  | .365*  | .718** | 0.098  | -0.215 | -0.235 | -0.252  | 1       |        |        |         |       |       |
| Pates.  | -.395*  | 0.067  | -0.195  | -0.042  | 0.017   | 0.194  | -0.163 | 0.277  | 0.056  | .352*  | 0.029   | -.454** | 1      |        |         |       |       |
| Lates.  | -0.186  | 0.236  | -.392*  | -.518** | .450**  | .736** | .642** | .677** | -0.241 | -0.100 | -.410** | .501**  | 0.090  | 1      |         |       |       |
| Planct. | 0.012   | 0.019  | -0.239  | -0.284  | .381*   | 0.079  | 0.227  | .325*  | .600** | -0.202 | -0.249  | 0.049   | -0.036 | 0.171  | 1       |       |       |
| Dep.    | -0.002  | 0.229  | -0.214  | -0.292  | 0.055   | .444** | 0.266  | .456** | -0.086 | 0.071  | 0.098   | 0.076   | .412** | .347*  | 0.033   | 1     |       |
| Ento.   | 0.230   | 0.141  | -0.307  | -0.134  | 0.227   | .327*  | 0.267  | .403** | 0.000  | 0.048  | -.338*  | 0.084   | -0.099 | .417** | .335*   | .357* | 1     |

Abbreviations of soil bacterial communities at phyla level are as follows: Proteo., Proteobacteria; Actino., Actinobacteria; Acido., Acidobacteria; Chlo., Chloroflexi; Rok., Rokubacteria; Gem., Gemmatimonadetes; Verru., Verrucomicrobia; Bac., Bacteroidetes; Firm., Firmicutes; Nitro., Nitrospirae; Pates., Patescibacteria; Lates., Latescibacteria; Planct., Planctomycetes; Dep., Dependientiae; Ento., Enttheonellaeota



Table S8. SEM model fit indices for all factors

| Statistics        |                           | Absolute fit index                                      |                             |                                                 | Baseline Comparisons   |                             |                             |                          |                            |
|-------------------|---------------------------|---------------------------------------------------------|-----------------------------|-------------------------------------------------|------------------------|-----------------------------|-----------------------------|--------------------------|----------------------------|
| Fitting Index     | $\chi^2$ test( $\chi^2$ ) | Chi-square/ $p$ -value degree of Freedom( $\chi^2$ /df) | Goodness of Fit Index (GFI) | Root Mean Square Error of Approximation (RMSEA) | Normed Fit Index (NFI) | Comparative Fit Index (CFI) | Incremental Fit Index (IFI) | Relative Fit Index (RFI) | Non-normed Fit Index (TLI) |
|                   |                           |                                                         |                             |                                                 |                        |                             |                             |                          |                            |
|                   | 95.882                    | 1.88                                                    | 0.918                       | 0.027                                           | 0.924                  | 0.958                       | 0.957                       | 0.972                    | 0.979                      |
| Fitting standards | The smaller the better    | <5                                                      | $\geq 0.80$                 | <0.08                                           | $\geq 0.80$            | $\geq 0.80$                 | $\geq 0.80$                 | $\geq 0.80$              | $\geq 0.80$                |
| Ideal value       | The smaller the better    | <3                                                      | >0.90                       | <0.05                                           | >0.90                  | >0.90                       | >0.90                       | >0.90                    | >0.90                      |

**Table S9.** Indirect, direct, and total effects between the observed variables in the SEM (standardized results)

| Observed variables |              | Direct effects | Indirect effects | Total effects |
|--------------------|--------------|----------------|------------------|---------------|
| Bacteria           | Regeneration | 0.84           | -                | 0.84          |
| Altitude           | Regeneration | 0.01           | 0.378            | 0.388         |
| Soil               | Regeneration | -0.17          | -0.697           | -0.867        |
| Herb               | Regeneration | -0.03          | -0.235           | -0.265        |
| Tit T              | Regeneration | 0.003          | -0.126           | -0.123        |
| Regeneration       | avg K        | -0.70          | -                | -0.70         |
| Soil               | Bacteria     | -0.83          | -                | -0.83         |
